# Supplementary material
Source: PubMed Central journal article supplement (PMC5797966)
Supplement: EMBR-19-351-s001.pdf [file EMBR-19-351-s001.pdf]

## Expanded View Figures

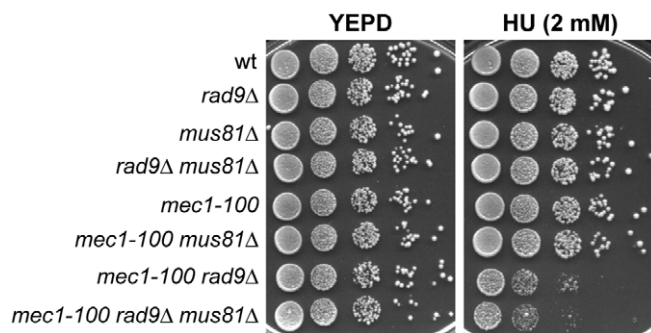

**Figure EV1. The lack of Mus81 does not suppress the HU hypersensitivity of *mec1-100 rad9Δ* cells.**

Exponentially growing cultures were serially diluted (1:10), and each dilution was spotted out onto YEPD plates with or without HU at the indicated concentrations.
